# Supplementary material for: Enhanced electrical conductivity of poly(methyl methacrylate)-quasi-block-polystyrene/multiwalled carbon nanotubes composites with an optimized double percolation mechanism
Source: Royal Society of Chemistry journal article supplement (doi:10.1039/c4ra03528c), 2014-08-06
Supplement: c4ra03528c1.pdf [file c4ra03528c1.pdf]

## Supplementary Information

# Enhanced electrical conductivity of poly(methyl methacrylate) -*quasi-block*-polystyrene /multiwalled carbon nanotubes composite with an optimized double percolation mechanism

Ri Xu, Xuecheng Xu\*

Department of Physics, East China Normal University, 500 DongChuan Road, 200241 Shanghai, China. E-mail: xcxu@phy.ecnu.edu.cn

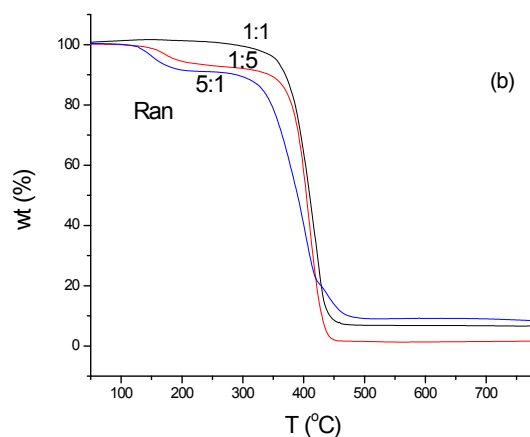

SI Fig.1 Thermal gravity analysis of random copolymer at weight ratio (MMA: St) of 5:1, 1:1, 1:5

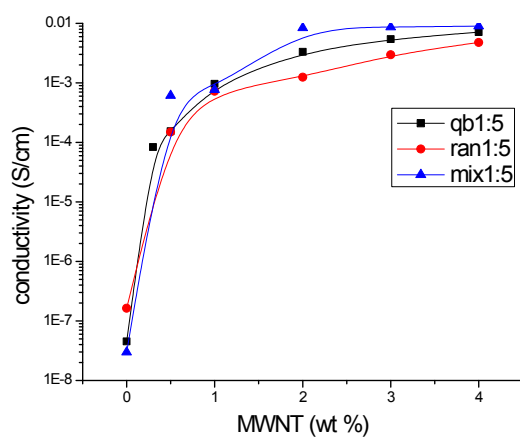

SI Fig.2 Dependence of sheet conductivity on MWNT's fillers weight fraction.at weight ratio (MMA: St) of 1:5

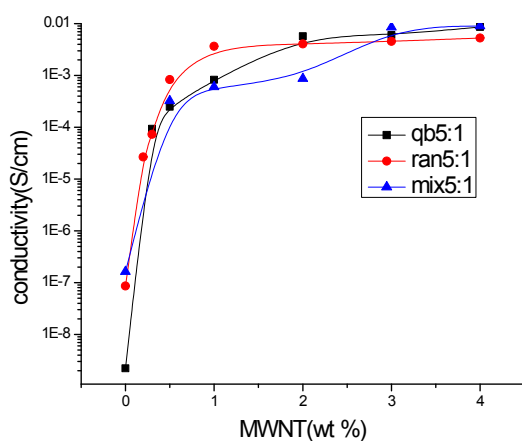

SI Fig.3 Dependence of sheet conductivity on MWNT's fillers weight fraction.at weight ratio (MMA: St) of 5:1

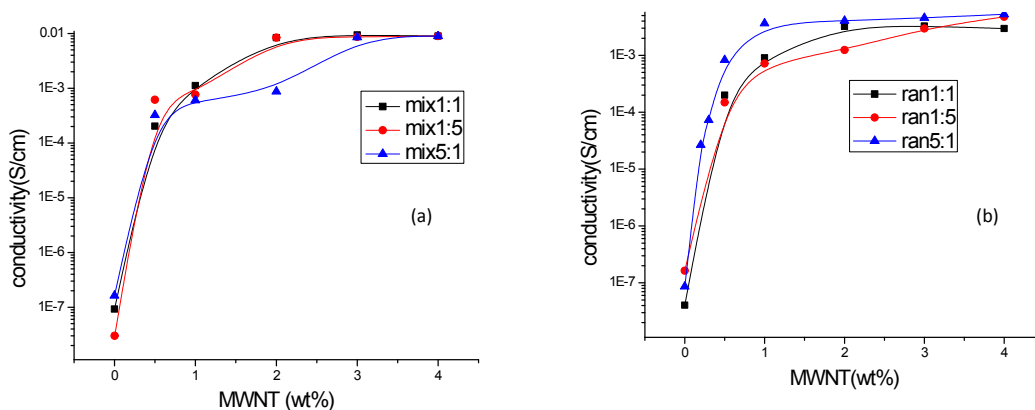

SI Fig.4 Dependence of sheet conductivity on MWNT's fillers weight fraction:

(a)mix1:1, mix1:5, mix5:1; (b)ran1:1, ran1:5, ran5:1

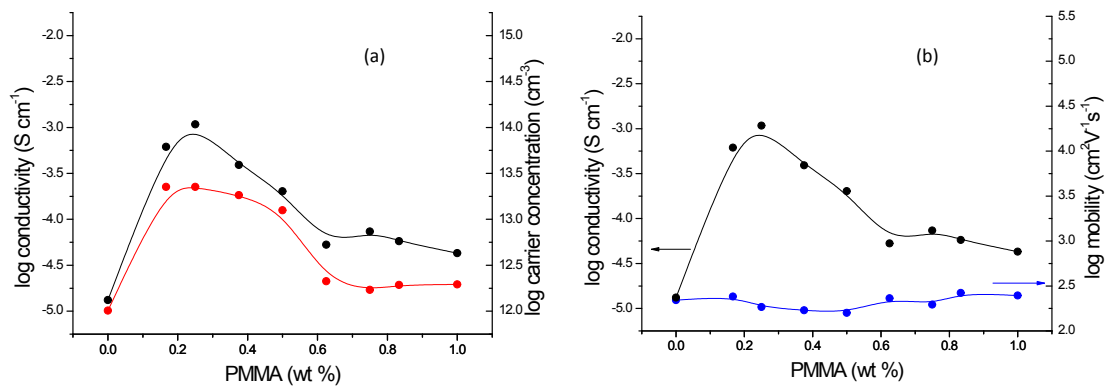

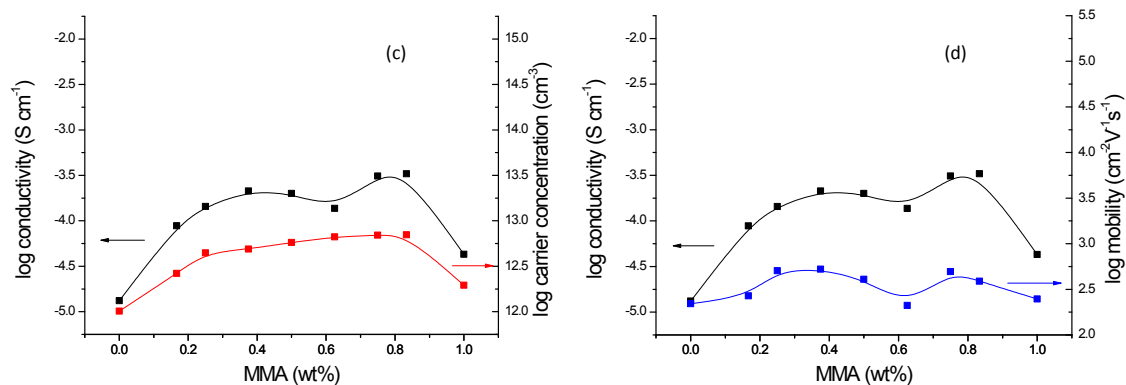

SI Fig. 5 Comparison of (a) carrier concentration (red) and sheet conductivity; (b) Comparison of mobility (blue) and sheet conductivity blends/MWNTs composites; (c) carrier concentration (red) and sheet conductivity; (d) Comparison of mobility (blue) and sheet conductivity of random copolymer/MWNTs composites

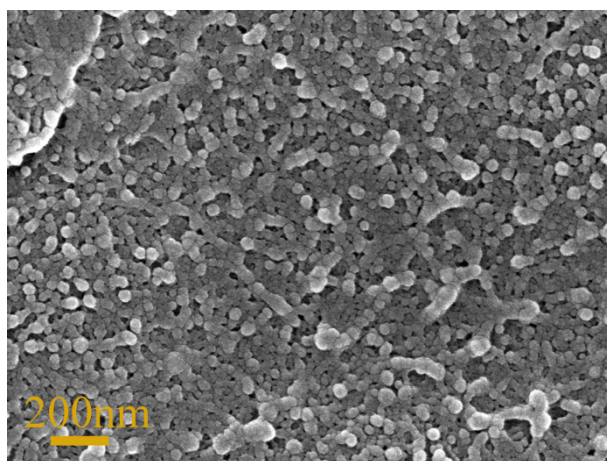

SI Fig. 6 SEM of cross-section of 0.5% qb1:1,

SI Table 1 Main peak positions (cm<sup>-1</sup>) of Phenyl groups from FTIR spectra of 1%qb1:1, 1%mix1:1, 1% ran1:1

|           | PS   | 1493 | 1600 | 1670 |
|-----------|------|------|------|------|
| 1%mix1:1  | 1488 | 1610 | 1541 | 1692 |
| 1%rand1:1 | 1489 | 1607 | 1540 | 1681 |
| 1%qb1:1   | 1489 | 1605 | 1543 | 1680 |
